# Supplementary material
Source: publisher figshare collection journal article supplement (https://frontiersin.figshare.com/ndownloader/files/31897685)
Supplement: Supplementary file [file 31897685]

Figure S1

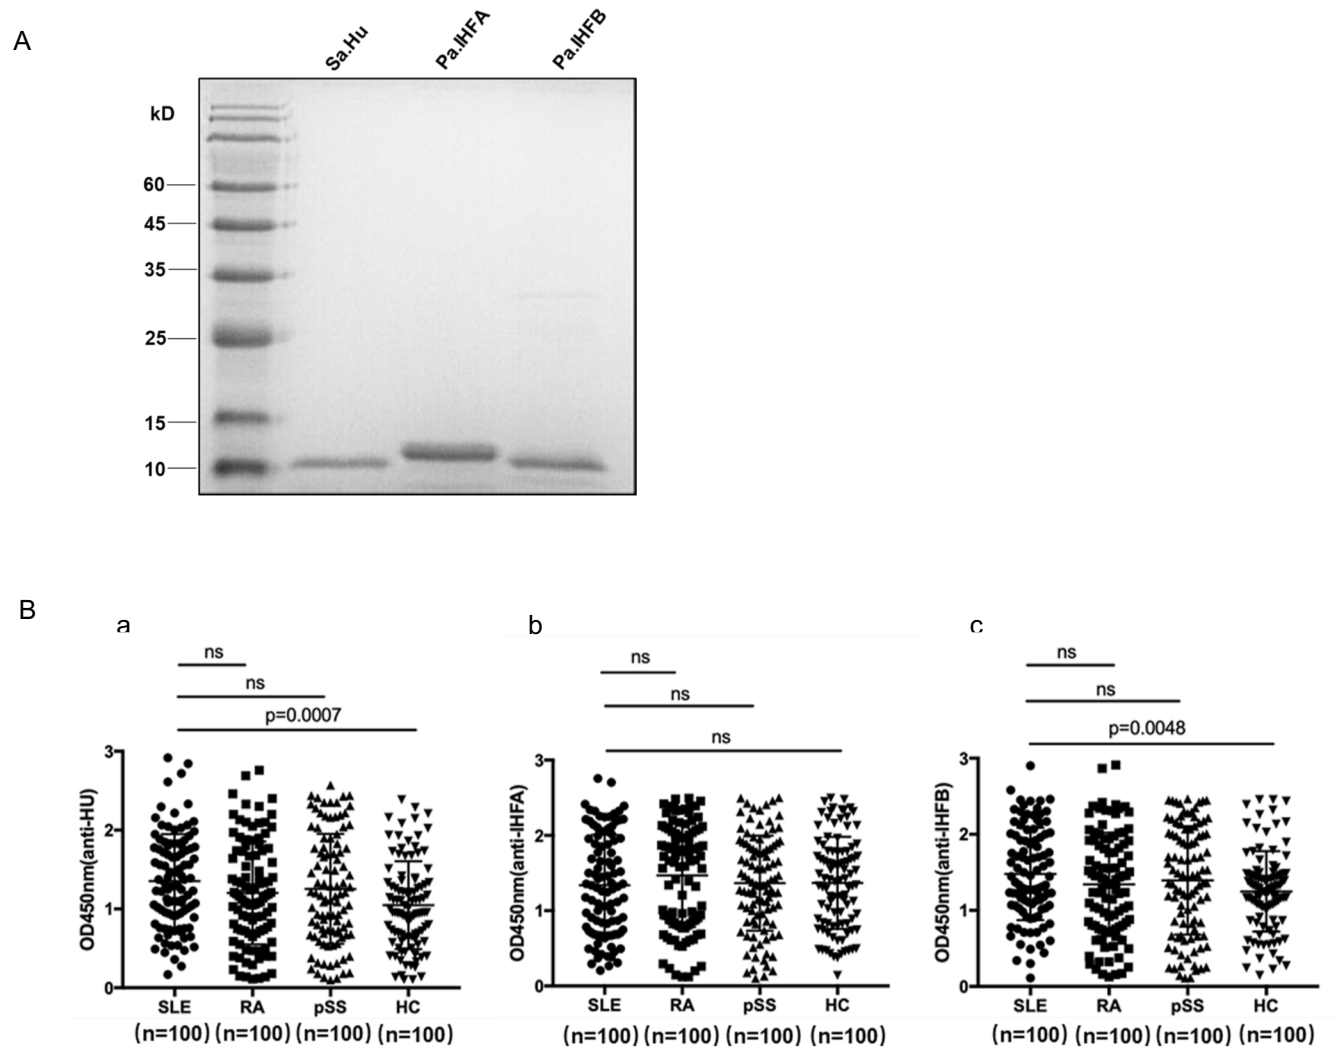

**Figure S1, related to Figure 1.**

(A) three recombinant DNABII proteins (Sa.HU, Pa.IHFA, and IHFB) were analyzed by sodium dodecyl sulfate-polyacrylamide gel electrophoresis (SDS-PAGE). These proteins have a molecular weight of approximately 10 kD. (B) Levels of antibodies against Sa.HU(a), Pa.IHFA(b), and Pa.IHFB(c) in sera from patients with SLE (n = 100), RA (n = 100), pSS (n = 100), and from HC (n = 100). Each point represents a measurement for an individual. Statistical analyses were performed with two-tailed unpaired Student's t test using GraphPad Prism 7 software.  $P > 0.05$  was considered nonsignificant. All data are presented as means  $\pm$  SD.

Figure S2

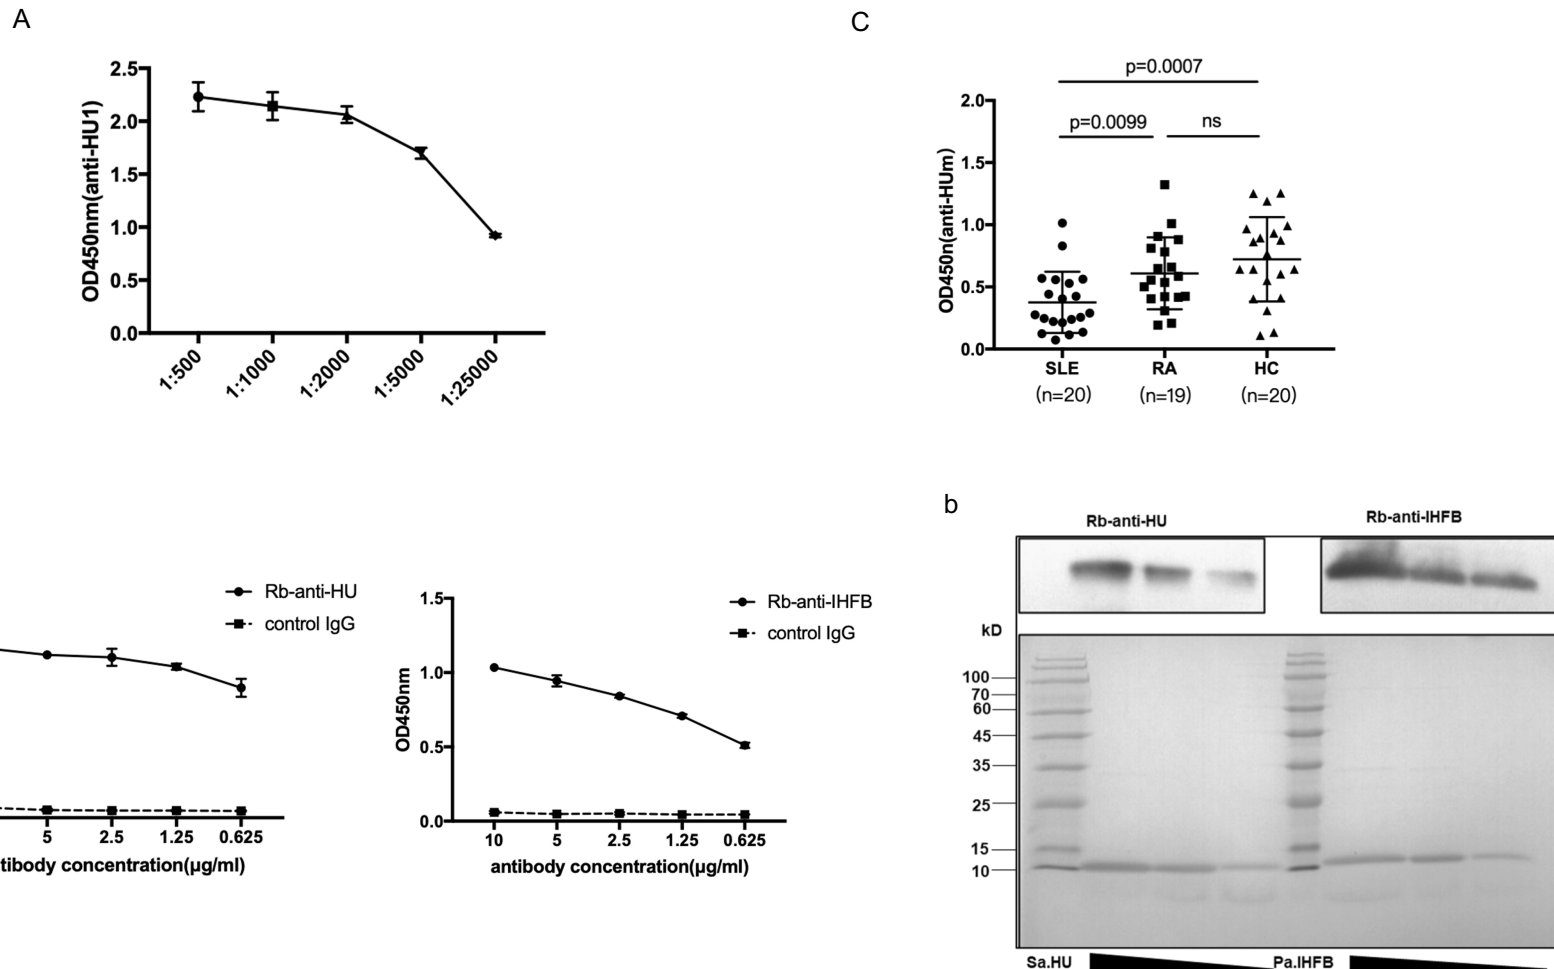

**Figure S2, related to Figure 2.**

(A)ELISA for the detection of anti-HU1 antibody levels in rabbit antiserum obtained from a KLH-HU1 immunized rabbit at different dilution ratios (from 1:500 to 1:25000). Data are representative of three independent experiments and are shown as mean  $\pm$  SD. (B)ELISA (a) and western blot (b, upper) showing the specific recognition of Rb-anti-HU and Rb-anti-IHFB with Sa.HU and Pa.IHFB individually. Sa.HU and Pa.IHFB (10  $\mu$ g, 5  $\mu$ g, 1  $\mu$ g) were analyzed by SDS-PAGE(b, lower).(C) Levels of antibodies against Sa.Hum in sera from patients with SLE (n=20), RA (n=20) and pSS (n=20). Each point represents a measurement for an individual. Statistical analyses were performed with two-tailed unpair Student's t test using GraphPad Prism 7 software.  $P>0.05$  was considered nonsignificant. All data are presented as means  $\pm$  SD.

Figure S3

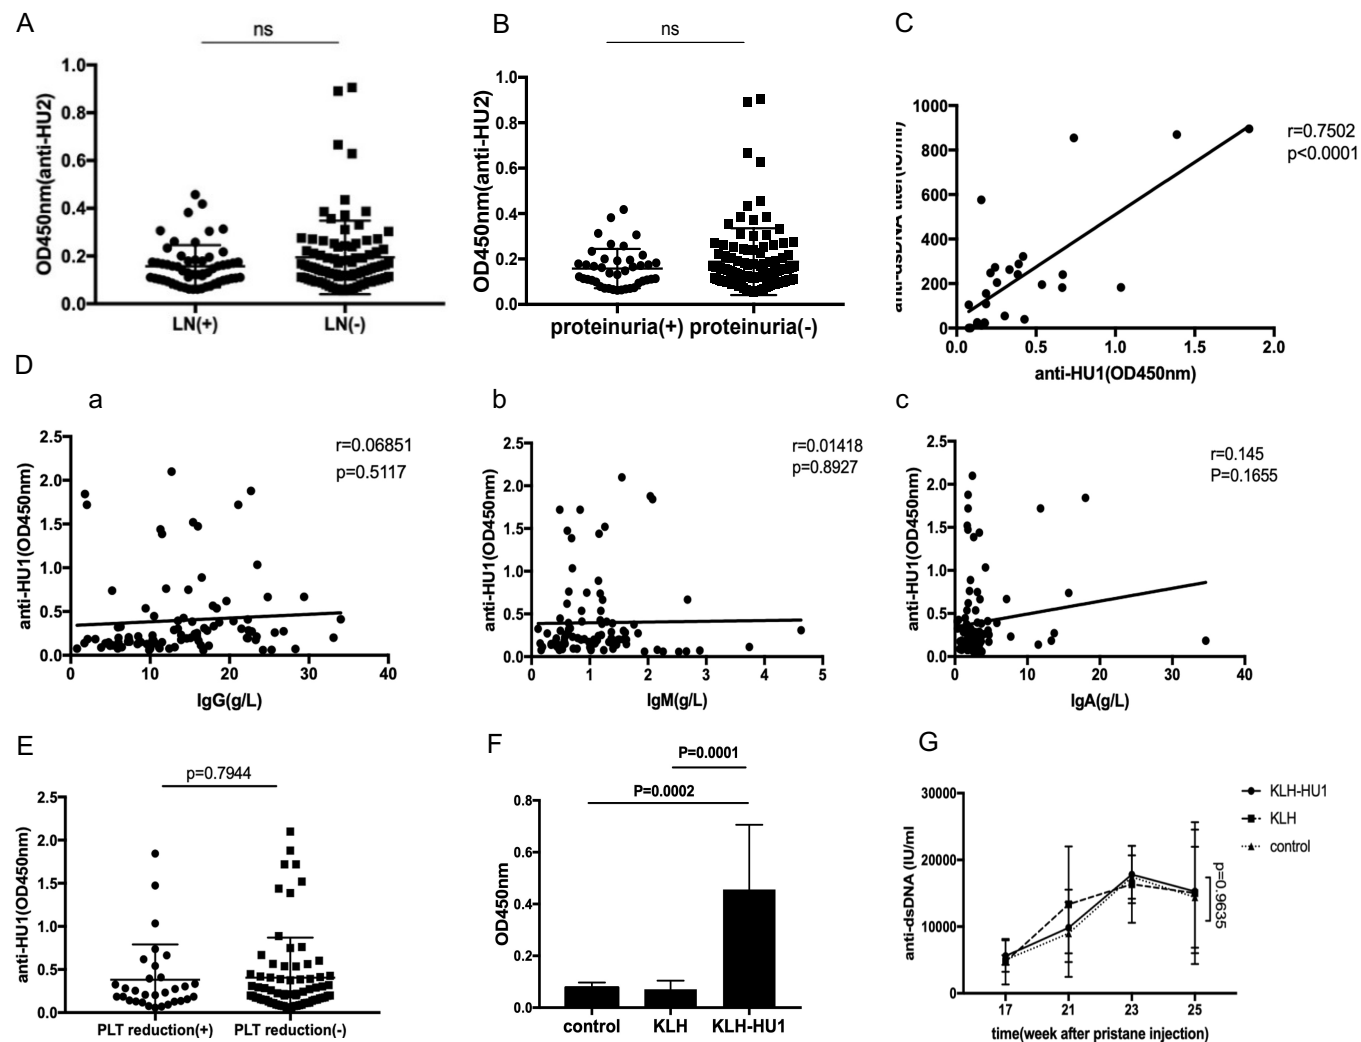

**Figure S3, related to Figure 3.**

(A) Correlation between anti-HU2 antibody in SLE patients with LN and patients with SLE alone. (B) Correlation between anti-HU2 antibody in SLE patients with proteinuria and without proteinuria. Statistical analyses were performed with two-tailed unpaired Student's *t* test using GraphPad Prism 7 software.  $P>0.05$  was considered nonsignificant. (C) Correlation between anti-HU1 antibody and anti-dsDNA antibody in sera from patients with SLE according to their clinical features. (D) Correlation between anti-HU1 antibody and concentration of IgG (a), IgM (b), and IgA (c) in sera from patients with SLE. Statistical analyses were performed with correlation analysis using GraphPad Prism 7 software.  $P>0.05$  was considered nonsignificant. (E) Correlation between anti-HU1 antibody and reduction of platelets (PLT) in patients with SLE. Statistical analyses were performed with two-tailed unpaired Student's *t* test using GraphPad Prism 7 software.  $P>0.05$  was considered nonsignificant. (F) Level of anti-HU1 in the sera (1:800) of mice immunized with KLH-HU1 and control groups by ELISA after 5 times of immunization ( $n=10$ , control;  $n=10$ , KLH;  $n=10$ , KLH-HU1). (G) Detection of anti-dsDNA antibody in sera of KLH-HU1 immunized mice and control groups mice at the indicated time. Statistical analyses were performed with a two-way ANOVA test using GraphPad Prism 7 software.  $P>0.05$  was considered nonsignificant. Data are shown as mean  $\pm$  SD.

Figure S4

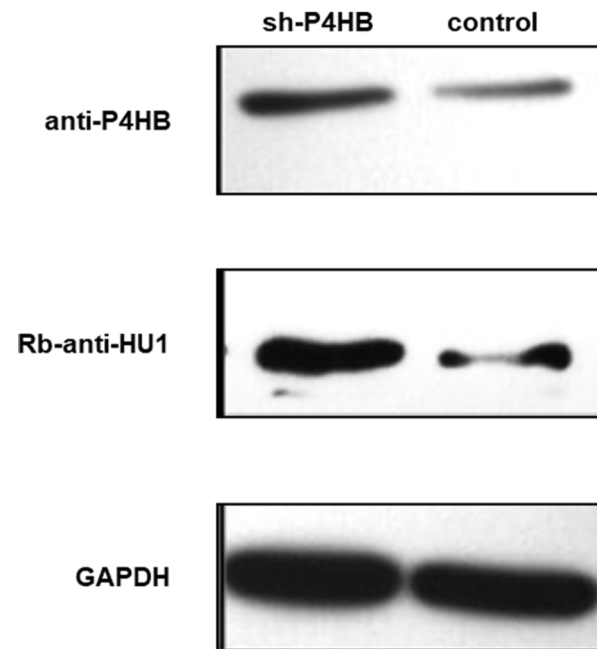

**Figure S4, related to Figure 4.** The expression of P4HB in HEK293T cells was inhibited by a specific small hairpin RNA targeting P4HB (sh-P4HB) by western blot.

Figure S5

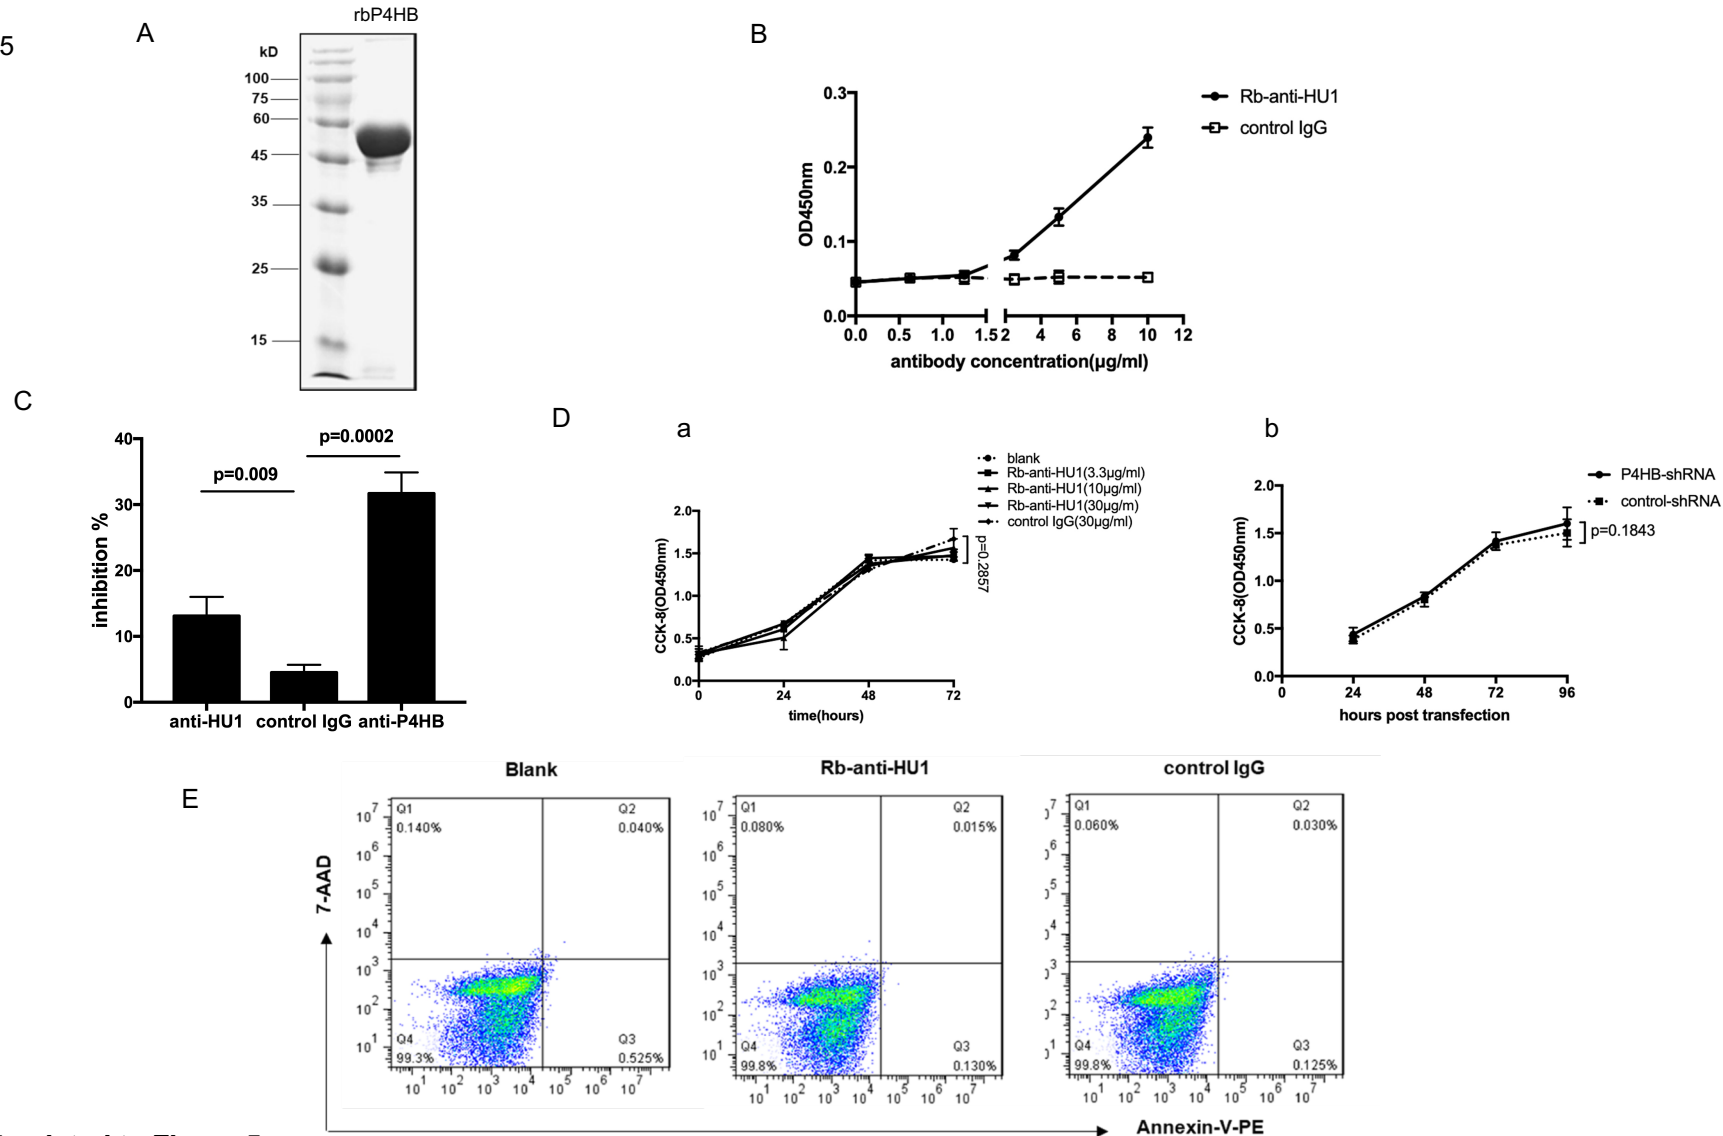**Figure S5, related to Figure 5.**

(A) Purified recombinant human P4HB (rhP4HB) was analyzed by SDS-PAGE. (B) Interaction between Rb-anti-HU1 and rhP4HB was detected by ELISA. Data are representative of three independent experiments and are shown as mean  $\pm$  SD. (C) Rb-anti-P4HB (0.15  $\mu$ g/ml) inhibited the activity of P4HB more effectively compared with the same concentration of anti-HU1. Statistical analyses were performed with two-tailed unpaired Student's t test using GraphPad Prism 7 software.  $P > 0.05$  was considered nonsignificant. (D) CCK8 assay was used to evaluate the proliferation of HEK293T cells after Rb-anti-HU1 treatment (a) and after transfection with the sh-P4HB or control shRNA (b). Statistical analyses were performed with a two-way ANOVA test using GraphPad Prism 7 software.  $P > 0.05$  was considered nonsignificant. (E) After incubation with Rb-anti-HU1 (0, 30  $\mu$ g/ml) or control IgG (30  $\mu$ g/ml) for 24 h, HEK293T cells were collected and stained with both Annexin-V-PE and 7-AAD for apoptosis analysis.

Table S1. Demographic Characteristics of the RA, pSS Patients and Controls

| Diagnose      | No. of patients | Mean Age  | Gender      |
|---------------|-----------------|-----------|-------------|
|               |                 | (Range)   | Male/Female |
|               |                 | yr        | No.         |
| RA            | 136             | 52(17-79) | 30/106      |
| pSS           | 133             | 56(18-79) | 5/128       |
| healthy donor | 150             | 45(22-60) | 25/125      |

Table S2. Demographic Characteristics of the SLE Patients

| Diagnose | No. of patients | Lupus nephritis |          | Mean Age  | Gender      |
|----------|-----------------|-----------------|----------|-----------|-------------|
|          |                 |                 |          | (Range)   | Male/Female |
|          |                 | positive        | negative | yr        | No.         |
| SLE      | 103             | 61              | 42       | 38(13-75) | 8/95        |

Table S3. Top 20 candidates identified by mass spectrometry from HEK293T cell lysis

| Rank       | Protein                   | Mass(Da)            | score             | Expressed on Cell membrane |
|------------|---------------------------|---------------------|-------------------|----------------------------|
| 1          | PERM HUMAN                | 84784               | 4600              | no                         |
| 2          | PLSL HUMAN                | 70814               | 2173              | yes                        |
| 3          | G6PI HUMAN                | 63335               | 1656              | no                         |
| 4          | TRFL HUMAN                | 80014               | 1625              | no                         |
| 5          | KPYM HUMAN                | 58470               | 1609              | no                         |
| 6          | CATA HUMAN                | 59947               | 1482              | no                         |
| 7          | K1C10 HUMAN               | 59020               | 1289              | no                         |
| 8          | K2C1 HUMAN                | 66170               | 1273              | yes                        |
| 9          | MYH9 HUMAN                | 227646              | 1187              | no                         |
| 10         | K22E HUMAN                | 65678               | 1035              | yes                        |
| 11         | FIBB HUMAN                | 56577               | 919               | no                         |
| <b>12*</b> | <b><i>PDIA1 HUMAN</i></b> | <b><i>57480</i></b> | <b><i>912</i></b> | <b><i>yes</i></b>          |
| 13         | COR1A HUMAN               | 51678               | 818               | no                         |
| 14         | CAP1 HUMAN                | 52325               | 732               | yes                        |
| 15         | PDIA3 HUMAN               | 57146               | 690               | no                         |
| 16         | ILEU HUMAN                | 42829               | 566               | no                         |
| 17         | HS71A HUMAN               | 70294               | 561               | no                         |
| 18         | PERE HUMAN                | 81985               | 544               | no                         |
| 19         | K1C9 HUMAN                | 62255               | 474               | no                         |
| 20         | TKT HUMAN                 | 68519               | 470               | no                         |

\*PDIA1(P4HB) is the only transmembrane protein with ~58 kDa molecular weight

Table S4. primers used in the study for PCR

| Protein  | Forward Primer(5'-3')          | Reverse Primer(5'-3')                                                                                                             |
|----------|--------------------------------|-----------------------------------------------------------------------------------------------------------------------------------|
| SA.HU    | GCTAGCATGAACAAAACAGATTTAAT     | CTCGAGTTATTTTACAGCATCTTTTA                                                                                                        |
| PA.IHFA  | GCTAGATGACCAAGTCGGAGTTG        | CTCGAGTTATGACTTGGTTCCAGCA                                                                                                         |
| PA.IHFB  | GCTAGCATGACCAAGTCGGAGTTGATCGAA | CTCGAGTCACTCCGGCTC                                                                                                                |
| SA.HUM   | GCTAGCATGAACAAAACAGATTTAAT     | CTCGAGTTATTTTACAGCATCTTTTAATGCTTTACCAGCTTTGAATGC<br>TGGAACTTTACTTGCTGGGATATCAATTTCTTTACCTGCTGCTGCTGC<br>TGCTGCTTTACGTGCAGCACGTT   |
| PA.IHFAM | GCTAGATGACCAAGTCGGAGTTG        | CTCGAGTCCGGCTCGTTGACCCGATCCCGCAACTCCTTGCCCGGCTT<br>GAAGTGCGGCACGAAC TTGCCGTCGAGGCGTACCGACTCCCCGTCTG<br>CTGCTGCTGCTGCGACGCGCGGG    |
| PA.IHFBM | GCTAGCATGACCAAGTCGGAGTTGATCGAA | CTCGAGTCACTCCGGCTCGTTGACCCGATCCCGCAACTCCTTGCCCG<br>GCTTGAAGTGCGGCACGAAC TTGCCGTCGAGGCGTACCGACTCCCCT<br>GCTGCTGCTGCTGCTGCGACGCGCGG |
